# Supplementary material for: Protein Binding of Benzofuran Derivatives: A CD Spectroscopic and In Silico Comparative Study of the Effects of 4-Nitrophenyl Functionalized Benzofurans and Benzodifurans on BSA Protein Structure
Source: MDPI journal article supplement (doi:10.3390/biom12020262), 2022-02-05
Supplement: s1 [file s1]

# Supporting Information

## Protein binding of benzofuran derivatives: A CD spectroscopic and in silico comparative study of the effects of 4-nitrophenyl functionalized benzofurans and benzodifurans on BSA protein structure.

Pasqualina Liana Scognamiglio <sup>1†</sup>, Caterina Vicidomini <sup>2†</sup>, Francesco Fontanella <sup>3</sup>, Claudio De Stefano <sup>3</sup>, Rosanna Palumbo <sup>2</sup>, and Giovanni N. Roviello <sup>2,\*</sup>

<sup>1</sup> Center for Advanced Biomaterial for Health Care (CABHC), Istituto Italiano di Tecnologia, I-80125 Naples, Italy; pasqualina.scognamiglio@iit.it

<sup>2</sup> Istituto di Biostrutture e Bioimmagini IBB-CNR; via Tommaso De Amicis 95, I-80145 Naples, Italy; caterina.vicidomini@ibb.cnr.it; rosanna.palumbo@cnr.it; giroviel@unina.it

<sup>3</sup> Department of Electrical and Information Engineering (DIEI), University of Cassino and Southern Lazio, Cassino, Italy; fontanella@unicas.it; destefano@unicas.it

\* Correspondence: giroviel@unina.it; Tel.: +39 3491928417 (G. N. R.)

† These authors contributed equally to this work.

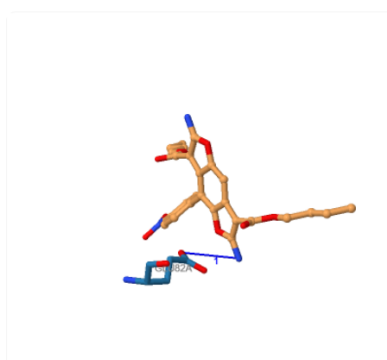

■ Protein  
 ■ Ligand  
 ■ Water  
 ● Charge Center  
 ○ Aromatic Ring Center  
 ● Metal Ion  
 .... Hydrophobic Interaction  
 — Hydrogen Bond  
 — Water Bridge  
 ....  $\pi$ -Stacking (parallel)  
 ....  $\pi$ -Stacking (perpendicular)  
 ....  $\pi$ -Cation Interaction  
 — Halogen Bond  
 .... Salt Bridge  
 .... Metal Complexation

#### Hydrogen Bonds

| Index | Residue | AA  | Distance H-A | Distance D-A | Donor Angle | Protein donor? | Side chain | Donor Atom | Acceptor Atom |
|-------|---------|-----|--------------|--------------|-------------|----------------|------------|------------|---------------|
| 1     | 82A     | GLU | 3.66         | 4.02         | 103.99      | ✗              | ✓          | 4865 [Npl] | 654 [O2]      |

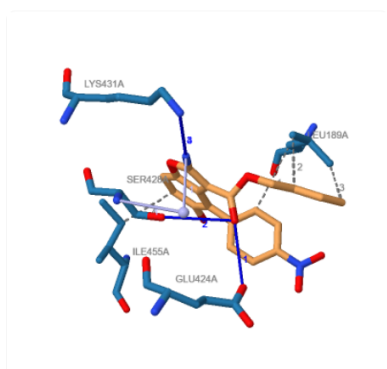

■ Protein  
 ■ Ligand  
 ■ Water  
 ● Charge Center  
 ○ Aromatic Ring Center  
 ● Metal Ion  
 .... Hydrophobic Interaction  
 — Hydrogen Bond  
 — Water Bridge  
 ....  $\pi$ -Stacking (parallel)  
 ....  $\pi$ -Stacking (perpendicular)  
 ....  $\pi$ -Cation Interaction  
 — Halogen Bond  
 .... Salt Bridge  
 .... Metal Complexation

#### Hydrophobic Interactions

| Index | Residue | AA  | Distance | Ligand Atom | Protein Atom |
|-------|---------|-----|----------|-------------|--------------|
| 1     | 189A    | LEU | 3.90     | 4851        | 1535         |
| 2     | 189A    | LEU | 3.05     | 4848        | 1537         |
| 3     | 189A    | LEU | 2.91     | 4856        | 1538         |
| 4     | 455A    | ILE | 3.22     | 4846        | 3652         |

#### Hydrogen Bonds

| Index | Residue | AA  | Distance H-A | Distance D-A | Donor Angle | Protein donor? | Side chain | Donor Atom | Acceptor Atom |
|-------|---------|-----|--------------|--------------|-------------|----------------|------------|------------|---------------|
| 1     | 424A    | GLU | 2.66         | 3.33         | 128.77      | ✓              | ✓          | 3416 [O3]  | 4833 [O2]     |
| 2     | 428A    | SER | 3.25         | 3.63         | 105.62      | ✓              | ✓          | 3446 [O3]  | 4833 [O2]     |
| 3     | 431A    | LYS | 2.89         | 3.45         | 115.57      | ✓              | ✓          | 3467 [N3]  | 4836 [Npl]    |
| 4     | 431A    | LYS | 3.01         | 3.45         | 108.66      | ✗              | ✓          | 4836 [Npl] | 3467 [N3]     |

#### Water Bridges

| Index | Residue | AA  | Dist. A-W | Dist. D-W | Donor Angle | Water Angle | Protein donor? | Donor Atom | Acceptor Atom | Water Atom |
|-------|---------|-----|-----------|-----------|-------------|-------------|----------------|------------|---------------|------------|
| 1     | 428A    | SER | 3.22      | 3.46      | 121.54      | 92.94       | ✓              | 3441 [Nam] | 4836 [Npl]    | 4680       |

**Figure S1.** 3D interaction diagrams for BDF1 (up) and BF1 (bottom) in complex with monomeric BSA (PDB ID: 4f5s, chain: A) obtained by PLIP (Protein-Ligand Interaction Profiler, <https://plip-tool.biotec.tu-dresden.de/>, accessed on 31 December 2021).

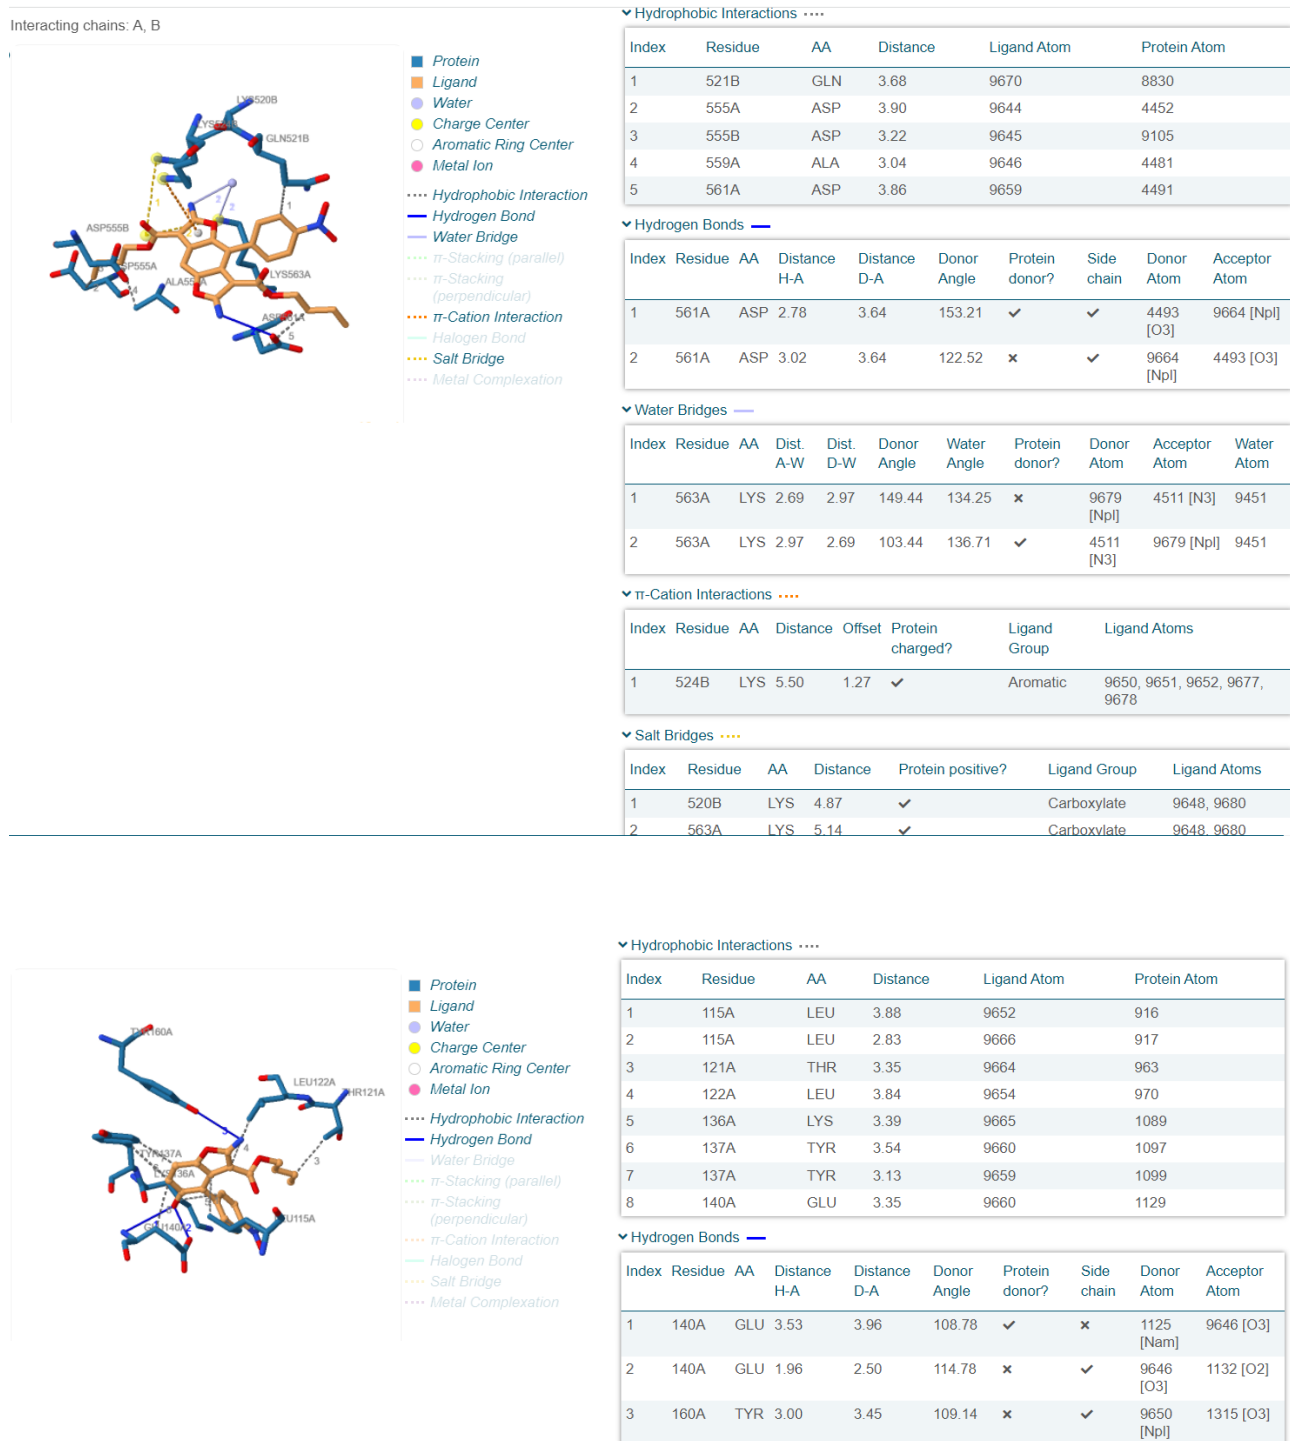

**Figure S2.** 3D interaction diagrams for BDF1 (up) and BF1 (bottom) in complex with dimeric BSA (PDB ID: 4f5s, chains: A,B) obtained by PLIP (Protein-Ligand Interaction Profiler, <https://plip-tool.biotec.tu-dresden.de/>, accessed on 31 December 2021).

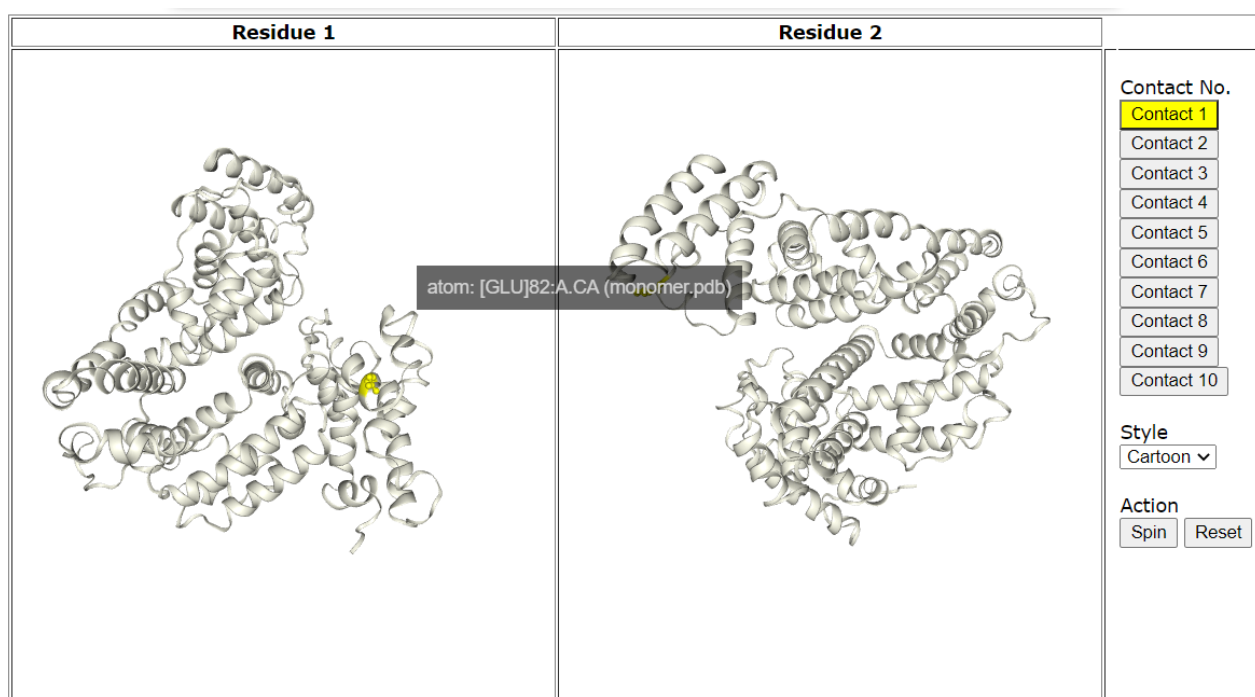

Summary of the top 10 contacts

| Rank            | 1       | 2       | 3       | 4       | 5       | 6       | 7       | 8       | 9       | 10      |
|-----------------|---------|---------|---------|---------|---------|---------|---------|---------|---------|---------|
| Residue 1       | GLU 97  | CYS 101 | GLU 97  | ARG 98  | LYS 180 | LYS 64  | GLU 97  | GLU 63  | GLU 100 | GLU 97  |
| Residue 2       | HIS 509 | HIS 509 | PRO 572 | HIS 509 | GLU 339 | GLU 503 | LYS 573 | PHE 501 | HIS 509 | GLY 571 |
| Predicted Score | 0.2149  | 0.2110  | 0.2052  | 0.1996  | 0.1969  | 0.1819  | 0.1795  | 0.1791  | 0.1790  | 0.1787  |

**Figure S3.** Inter-protein residue-residue contacts for homo-dimeric BSA as predicted by DeepHomo Server (<http://huanglab.phys.hust.edu.cn/deephomo/data/61ce50fad2e29/>, accessed on 31 December 2021). Note how Glu-82 lies in the vicinity of one of the main residues (Glu-97) involved in the dimerization of BSA as predicted by DeepHomo Server.

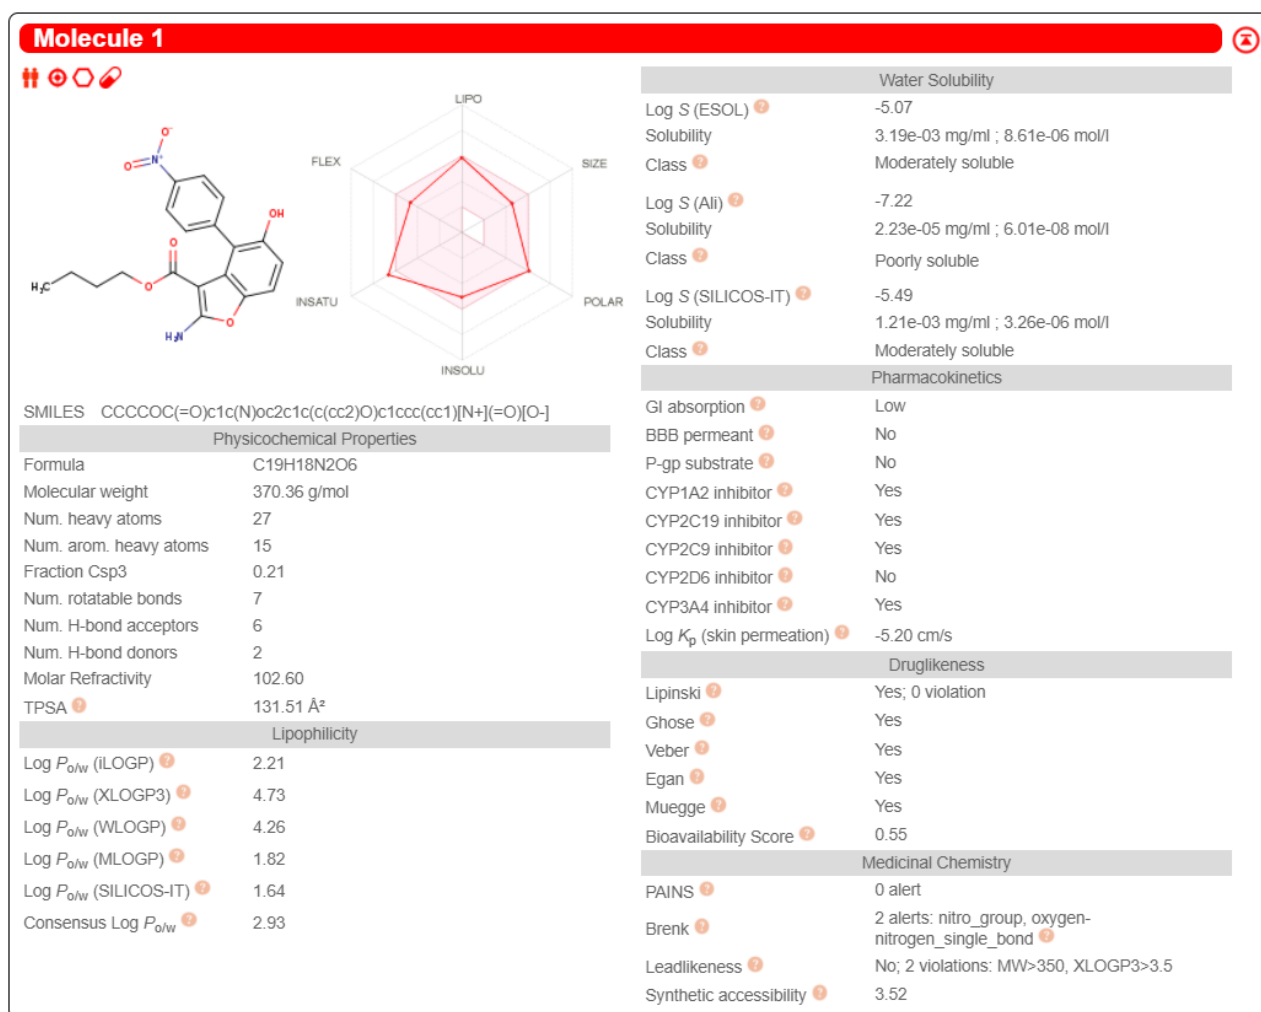

**Figure S4.** Pharmacokinetic properties, including partition coefficients (cLogP), blood–brain barrier (BBB) permeability, pan-assay interference compounds (PAINS) score, and other druggability properties, predicted by SwissADME (<http://www.swissadme.ch/index.php>, accessed on 14 December 2021) for BF1.

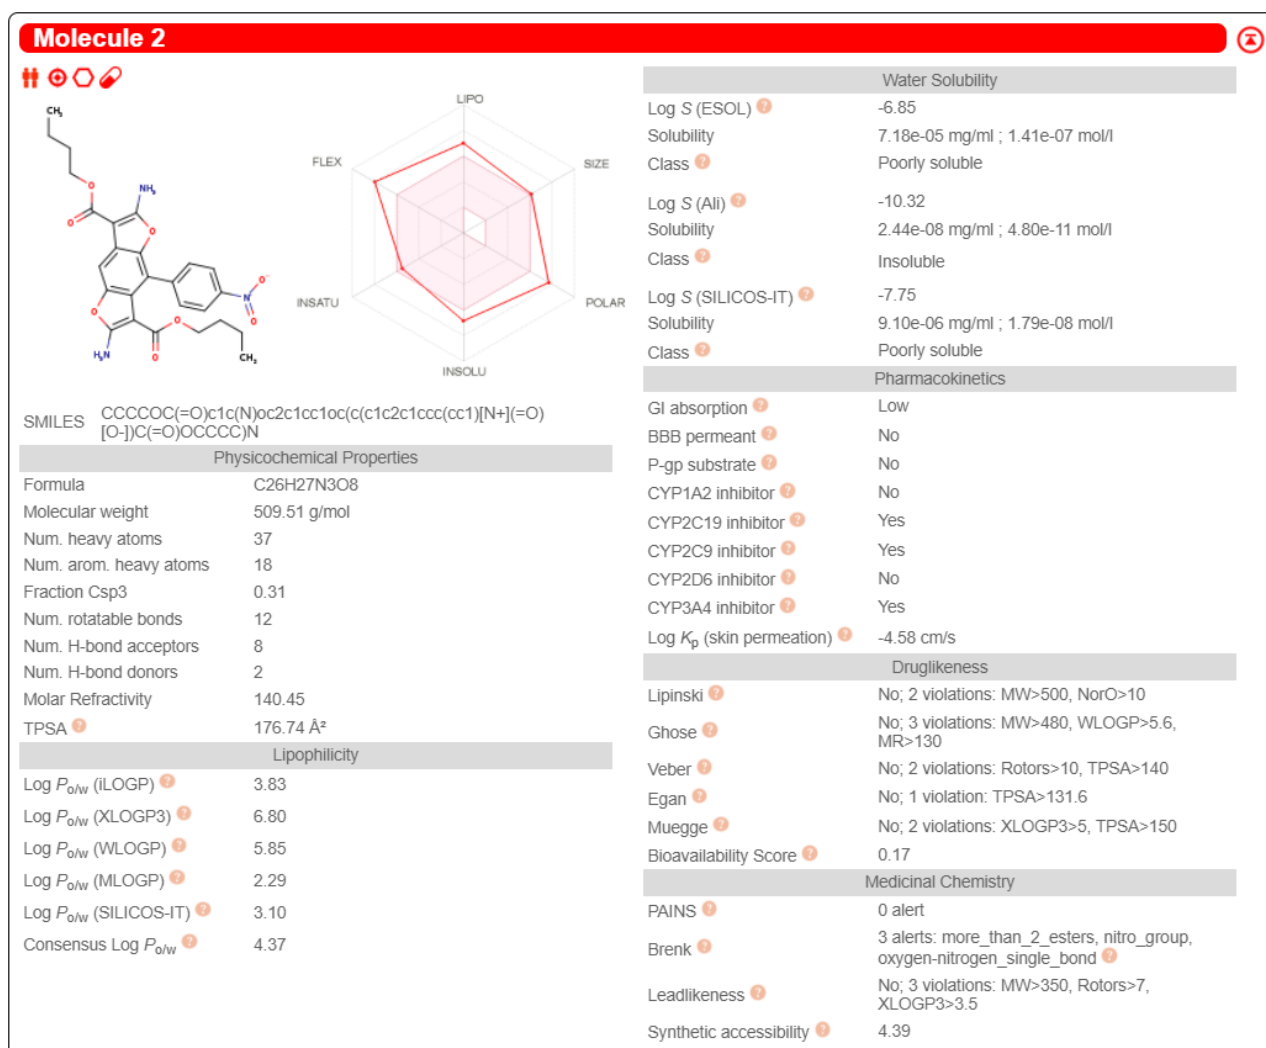

**Figure S5.** Pharmacokinetic properties, including partition coefficients (cLogP), blood–brain barrier (BBB) permeability, pan-assay interference compounds (PAINS) score, and other druggability properties, predicted by SwissADME (<http://www.swissadme.ch/index.php>, accessed on 14 December 2021) for BDF1.
